# Supplementary material for: Weighted Gene Coexpression Network Analysis Identifies an Immunogenic Cell Death Signature for Predicting Prognosis and Therapeutic Responses in Glioblastoma
Source: Research Square preprint supplement (doi:10.21203/rs.3.rs-3338131/v1), 2023-09-29
Supplement: Supplementary file 2 [file 7499714025e7d07ba5ea0d14.xlsx]

## Sheet: Sheet1
symbol	coef
CIDEB	0.021761
VDR	0.126874
